# Supplementary material
Source: MDPI journal article supplement (https://www.mdpi.com/2673-9801/3/1/2)
Supplement: s1 [file s1 › Supplementary Figure S1.pdf]

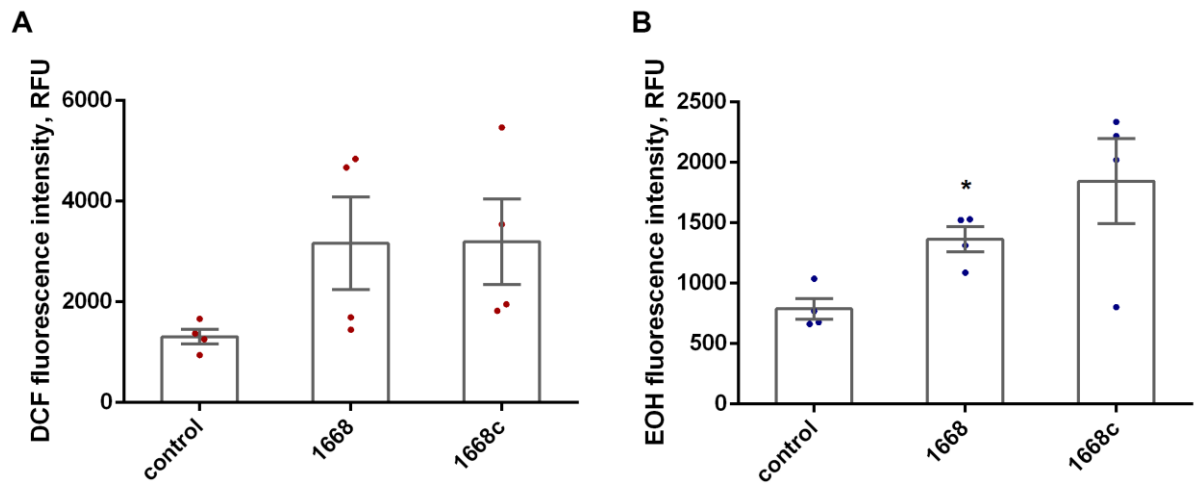

Supplementary Figure S1. *Inversion of the CpG motif to GpC does not affect the prooxidant effect of class B ODN 1668.* H<sub>2</sub>DCF-DA-loaded (A) or DHE-stained (B) PMNLs were incubated without additives (control) or with 1  $\mu$ M ODN 1668 (tccatga**cg**ttcctgatgct) or ODN 1668c (tccatga**g**cttcctgatgct) in HBSS/HEPES medium for at least 30 min at 37 °C in 5% CO<sub>2</sub>. DCF (A) or EOH (B) fluorescence (ex/em 488/525 or 480/567 nm, respectively) was measured every 10 min for DCF and every 5 min for EOH. Data are represented as scatter plots with bars indicating means  $\pm$  SEM of fluorescence intensity values at 30 min after addition of stimuli (\* $p$ <0.05 compared with controls, RM one-way ANOVA, Tukey's multiple comparison test).
