# Supplementary material
Source: MDPI journal article supplement (https://www.mdpi.com/2673-9801/3/1/2)
Supplement: s1 [file s1 › Supplementary Figure S2.pdf]

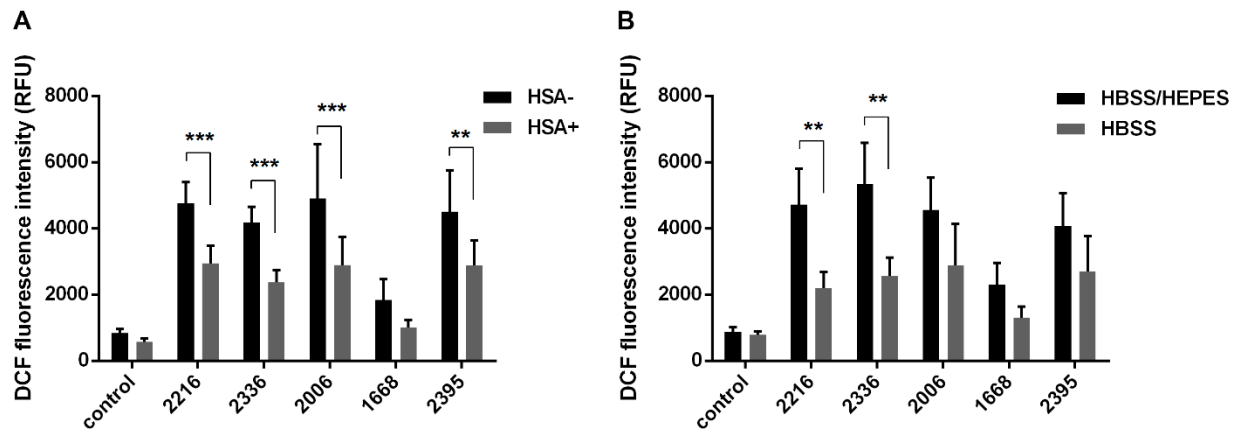

Supplementary Figure S2. *Excessive ROS generation by neutrophils treated with PS ODNs decreases in the presence of HSA and is sensitive to pH balance.* (A) H<sub>2</sub>DCF-DA-loaded PMNLs ( $4 \times 10^5$  cells/mL) were incubated for 30 min at 37 °C in 5% CO<sub>2</sub> in HBSS/HEPES supplemented (grey bars) or not (black bars) with 0.5% HSA without additives (control) or with 1  $\mu$ M ODNs. (B) H<sub>2</sub>DCF-DA-loaded PMNLs ( $4 \times 10^5$  cells/mL) were incubated for 30 min at 37 °C in 5% CO<sub>2</sub> in HBSS/HEPES (black bars) or HBSS (grey bars) medium without additives (control) or with 1  $\mu$ M ODNs. DCF fluorescence (ex/em 488/525) was measured every 10 min. Data are represented as with bars indicating means  $\pm$  SEM of fluorescence intensity values at 30 min after addition of ODNs (\*\*p<0.01, \*\*\*p<0.001 for pairs of data indicated, RM one-way ANOVA, Sidak's multiple comparison test).
